# Supplementary material for: Bacillus subtilis 5′-nucleotidases with various functions and substrate specificities
Source: PubMed Central journal article supplement (PMC5080769; doi:10.1186/s12866-016-0866-5), 2016-10-26
Supplement: 12866_2016_866_MOESM1_ESM.pdf [file 12866_2016_866_MOESM1_ESM.pdf]

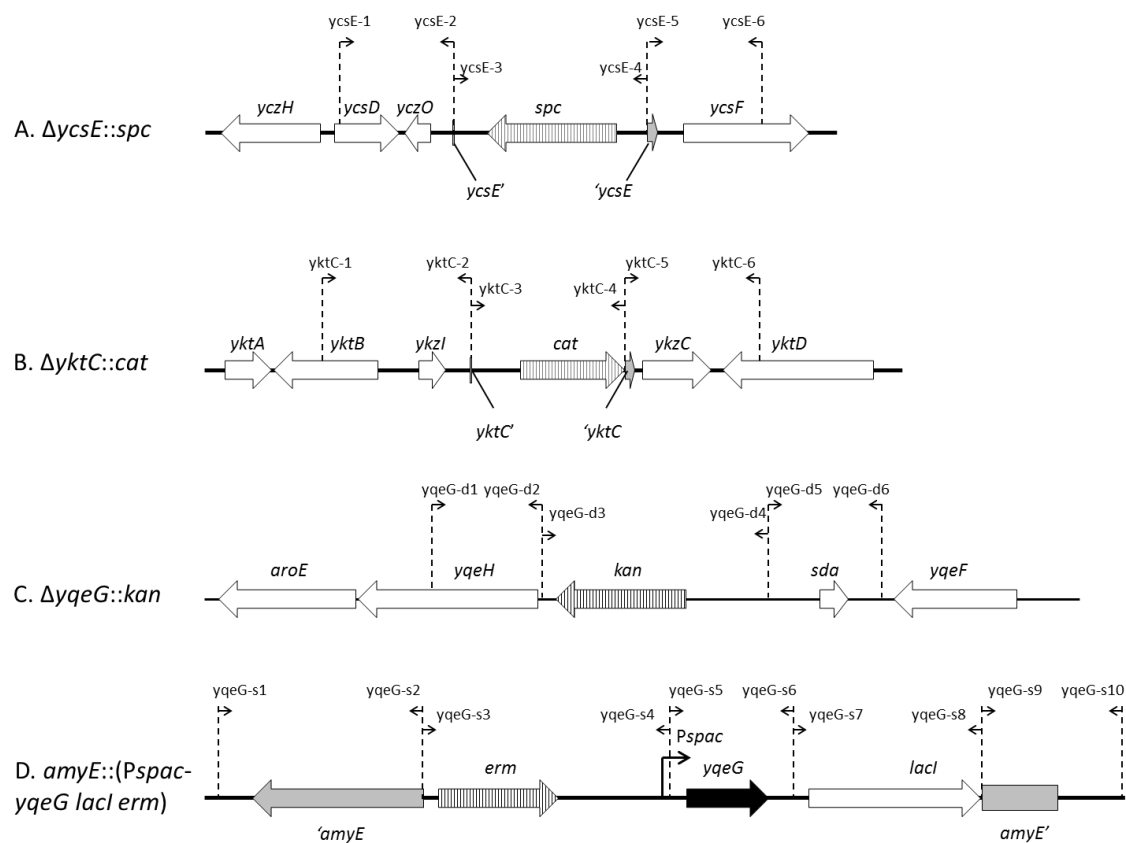

**Fig. S1. Genetic organization of the altered chromosomal loci;  $\Delta ycsE::spc$  (A),  $\Delta yktC::cat$  (B),  $\Delta yqeG::kan$  (C), and  $amyE::(Pspac-yqeG lacI erm)$  (D). Genes and primers are indicated schematically by thick arrows and arrowheads, respectively.**
